# Supplementary material for: Normalizing Effect of Heat Treatment Processing on 17-4 PH Stainless Steel Manufactured by Powder Bed Fusion
Source: MDPI journal article supplement (doi:10.3390/met12050704), 2022-04-20
Supplement: s1 [file s1]

**Supplementary Table S1.** Mechanical properties of 17-4 PH SS produced by L-PBF from previous studies [23, 26-31]

| Ref. No. | Title                                                                                                                                                                                                                                                                        | Heat treatment                            | Building direction | Yield strength (MPa) | Elongation (%) |
|----------|------------------------------------------------------------------------------------------------------------------------------------------------------------------------------------------------------------------------------------------------------------------------------|-------------------------------------------|--------------------|----------------------|----------------|
| 23       | LeBrun, T.; Nakamoto, T.; Horikawa, K.; Kobayashi, H. Effect of retained austenite on subsequent thermal processing and resultant mechanical properties of selective laser melted 17-4 PH stainless steel. Mater. Des. 2015, 81, 44-53.                                      | AB                                        | NA                 | 661                  | 16.2           |
|          |                                                                                                                                                                                                                                                                              | CA                                        | NA                 | 939                  | 9              |
|          |                                                                                                                                                                                                                                                                              | H900                                      | NA                 | 945                  | 15.5           |
|          |                                                                                                                                                                                                                                                                              | H1025                                     | NA                 | 870                  | 13.3           |
|          |                                                                                                                                                                                                                                                                              | H1150                                     | NA                 | 1005                 | 11.1           |
|          |                                                                                                                                                                                                                                                                              | CA+H900                                   | NA                 | 1352                 | 4.6            |
|          |                                                                                                                                                                                                                                                                              | CA+H1025                                  | NA                 | 1121                 | 9.6            |
| 26       | Auguste, P.; Mauduit, A.; Fouquet, L.; Pilot, S. Study on 17-4 PH stainless steel produced by selective laser melting. UPB. Sci. Bull. Ser. B-Chem. Mater. Sci. 2018, 80, 197-210.                                                                                           | CA+H1150                                  | NA                 | 859                  | 16.6           |
|          |                                                                                                                                                                                                                                                                              | AB                                        | H                  | 850                  | 13             |
|          |                                                                                                                                                                                                                                                                              | AB                                        | V                  | 760                  | 2.5            |
|          |                                                                                                                                                                                                                                                                              | 550 °C/4 hr                               | H                  | 1210                 | 0.5            |
|          |                                                                                                                                                                                                                                                                              | 1040 °C/1.5 hr + 480 °C/1 hr              | H                  | 785                  | 4.6            |
|          |                                                                                                                                                                                                                                                                              | 1040 °C/1.5 hr + 480 °C/1 hr              | V                  | 590                  | 1              |
|          |                                                                                                                                                                                                                                                                              | 1190 °C/2 hr +1040 °C/1.5 hr +480 °C/1 hr | H                  | 1400                 | 3              |
| 27       | Nezhadfar, P. D.; Burford, E.; Anderson-Wedge, K.; Zhang, B.; Shao, S.; Daniewicz, S. R.; Shamsaei, N. Fatigue crack growth behavior of additively manufactured 17-4 PH stainless steel: Effects of build orientation and microstructure. Int. J. Fatig. 2019, 123, 168-179. | 1190 °C/2 hr +1040 °C/1.5 hr +480 °C/1 hr | V                  | 1240                 | 1              |
|          |                                                                                                                                                                                                                                                                              | AB                                        | H                  | 650                  | 9.8            |
|          |                                                                                                                                                                                                                                                                              | AB                                        | V                  | 720                  | 6.4            |
|          |                                                                                                                                                                                                                                                                              | 1038 °C/0.5 hr + 482 °C/1 hr              | H                  | 910                  | 7.8            |
|          |                                                                                                                                                                                                                                                                              | 1038 °C/0.5 hr + 482 °C/1 hr              | V                  | 950                  | 3.5            |
| 28       | Yadollahi, A.; Shamsaei, N.; Thompson, S. M.; Elwany, A.; Bian, L. Effects of building orientation and heat treatment on fatigue behavior of selective laser melted 17-4 PH stainless steel. Int. J. Fatig. 2017, 94, 218-235.                                               | 1050 °C/0.5 hr + 552 °C/4 hr              | V                  | 1176                 | 32.7           |
|          |                                                                                                                                                                                                                                                                              | AB                                        | H                  | 650                  | 14.5           |
|          |                                                                                                                                                                                                                                                                              | AB                                        | V                  | 580                  | 5.8            |
|          |                                                                                                                                                                                                                                                                              | CA + H900                                 | H                  | 1250                 | 11             |
| 29       | Hu, Z.; Zhu, H.; Zhang, H.; Zeng, X. Experimental investigation on selective laser melting of 17-4PH stainless steel. Optic. Laser. Tech. 2017, 87, 17-25.                                                                                                                   | CA + H900                                 | V                  | 1020                 | 2.8            |
|          |                                                                                                                                                                                                                                                                              | 1040 °C/0.5 hr + 550 °C/4 hr              | NA                 | 1032                 | 16.64          |
| 30       | Pasebani, S.; Ghayoor, M.; Badwe, S.; Irrinki, H.; Atre, S. V. Effects of atomizing media and post processing on mechanical properties of 17-4 PH stainless steel manufactured via selective laser melting. Addit. Manuf. 2018, 22, 127-137.                                 | H1150                                     | NA                 | 1116                 | 5.1            |

AB: as-built

NA: not available

H: horizontal direction

V: vertical direction

CA: condition A

**Supplementary Table S2.** Result of EBSD-Phases map showing phases fraction of AB and HT specimens

| Specimens | FCC (austenite) fraction (%) | BCC (ferrite and/or martensite) fraction (%) |
|-----------|------------------------------|----------------------------------------------|
| AB        | 1.7                          | 98.3                                         |
| N         | 9.8                          | 90.2                                         |
| S         | 1.0                          | 99.0                                         |
| SA        | 0.9                          | 99.1                                         |
| NSA       | 1.0                          | 99.0                                         |

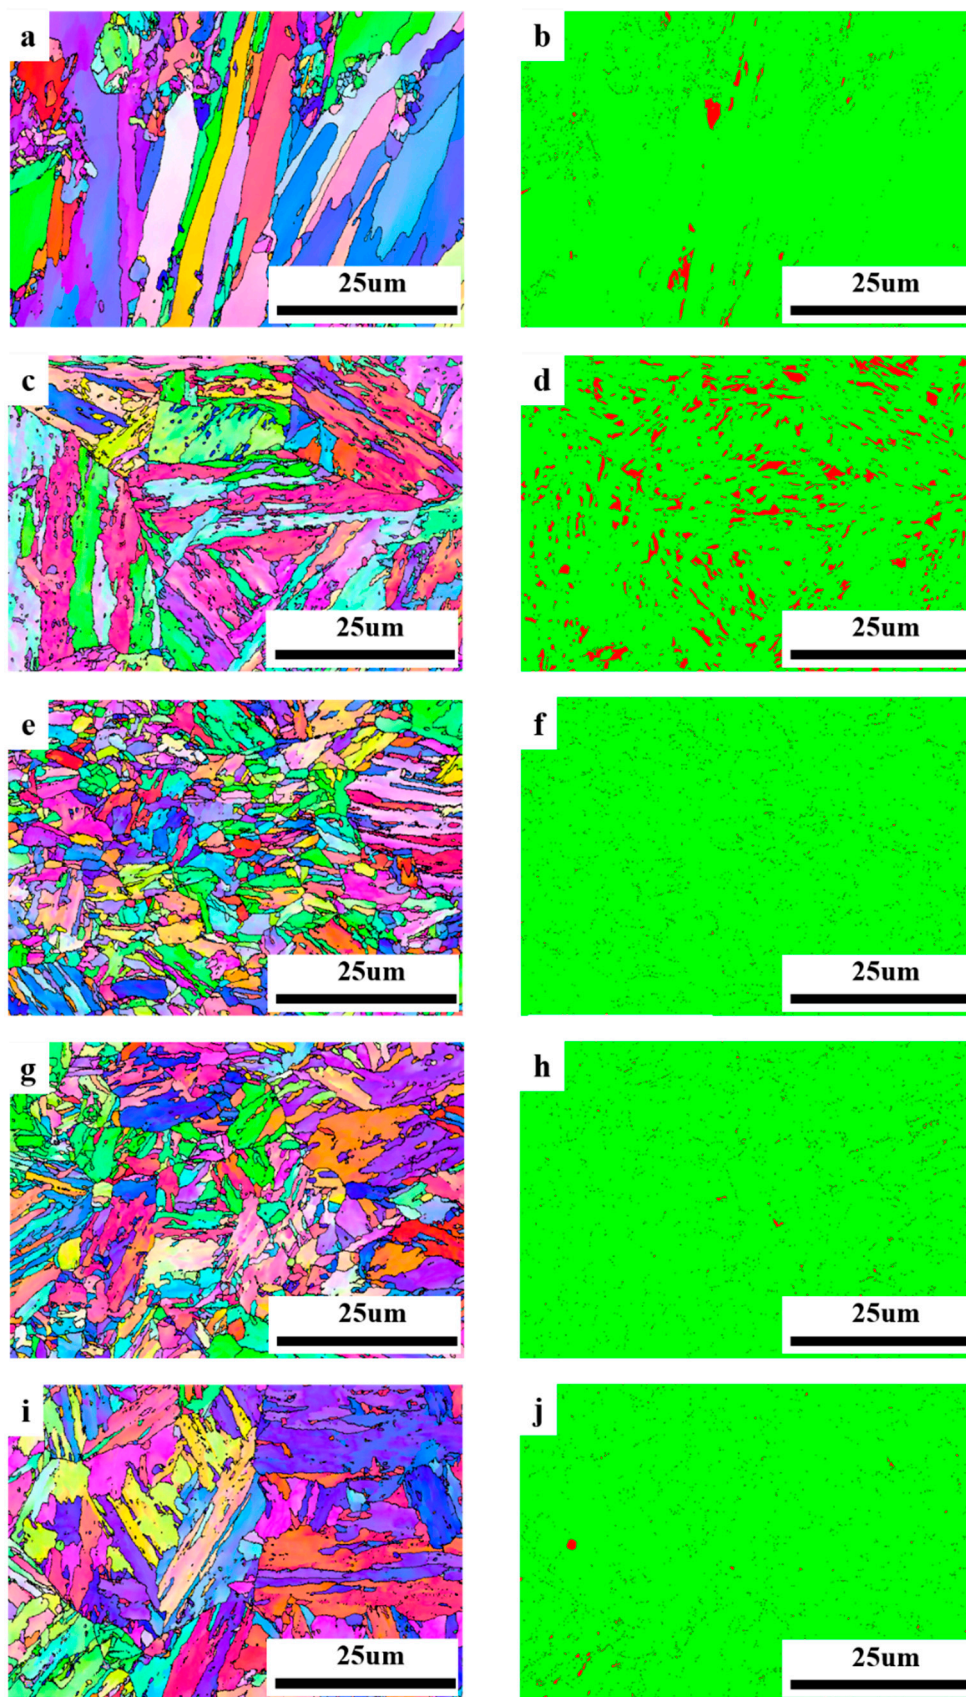

**Supplementary Figure S1.** EBSD orientation maps and Phase maps (green: ferrite and/or martensite, red: austenite) obtained from the as-built and heat treated 17-4 PH samples: (a-b) AB, (c-d) N, (e-f) S, (g-h) SA, (i-j) NSA.



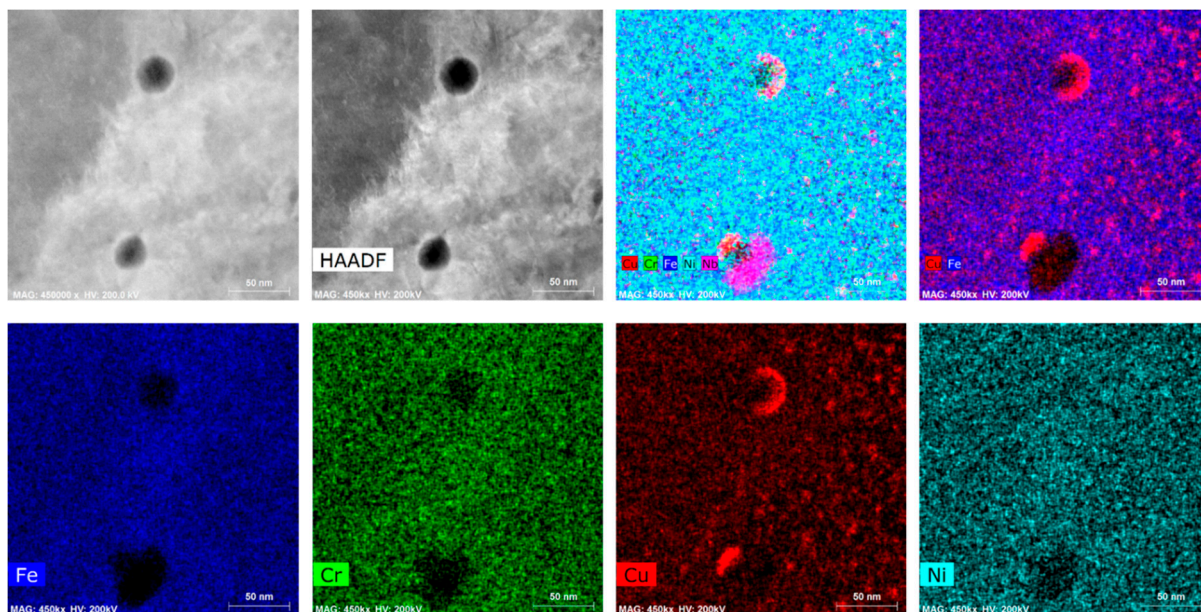

**Supplementary Figure S2.** TEM-EDS analysis of SA specimen showing inhomogeneous Cu-rich precipitation (magnification: 450 kx)

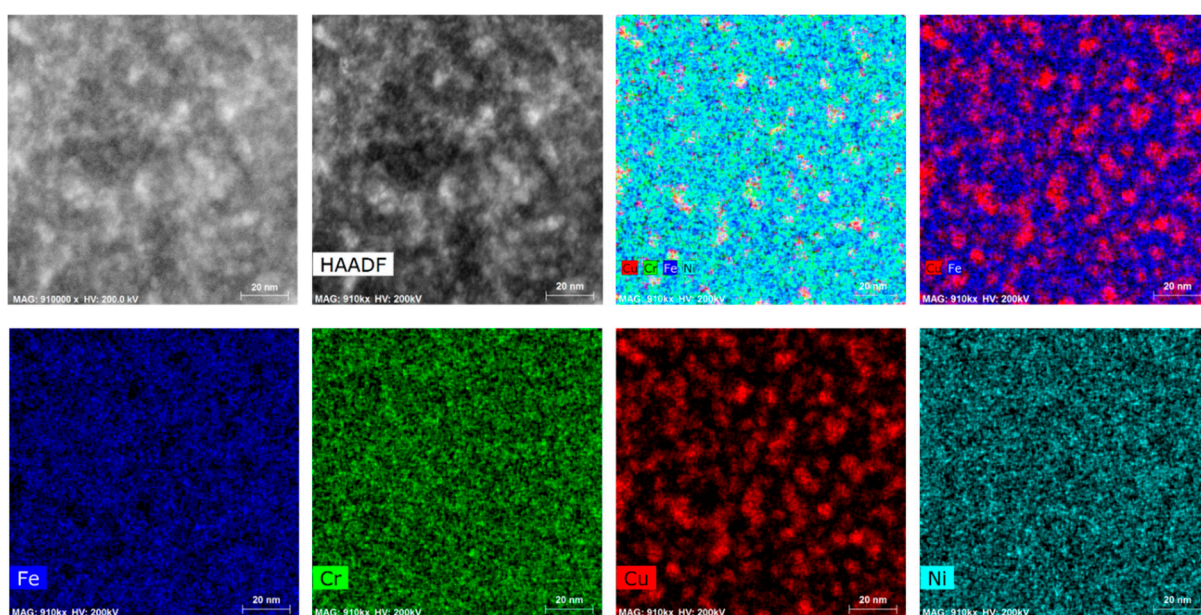

**Supplementary Figure S3.** TEM-EDS analysis of SA specimen showing nano-scale Cu-rich precipitation (magnification: 910 kx)

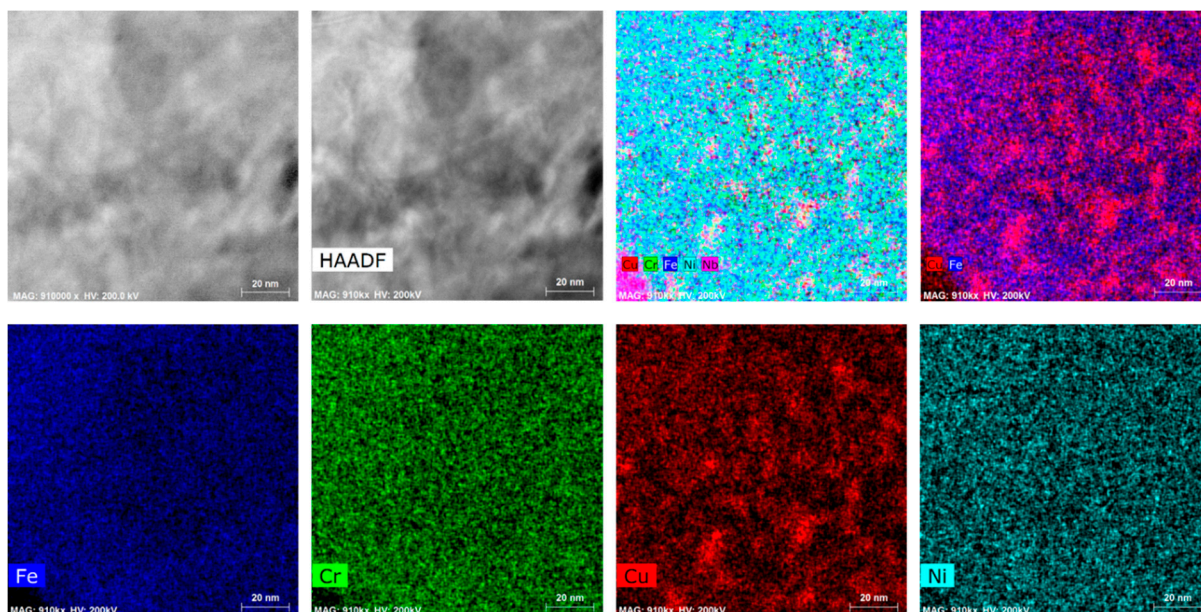

**Supplementary Figure S4.** TEM-EDS analysis of SA specimen showing homogeneous Cu-rich precipitation (magnification: 910 kx)



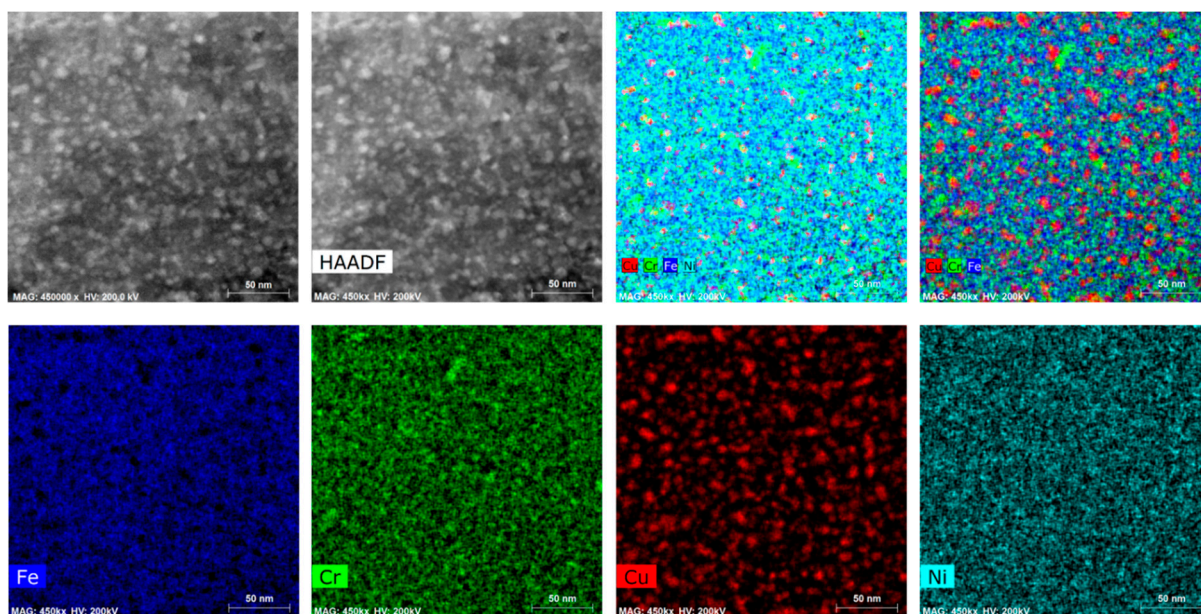

**Supplementary Figure S5.** TEM-EDS analysis of **NSA specimen** showing homogeneous nano-scale Cu-rich precipitation (magnification: 450 kx)

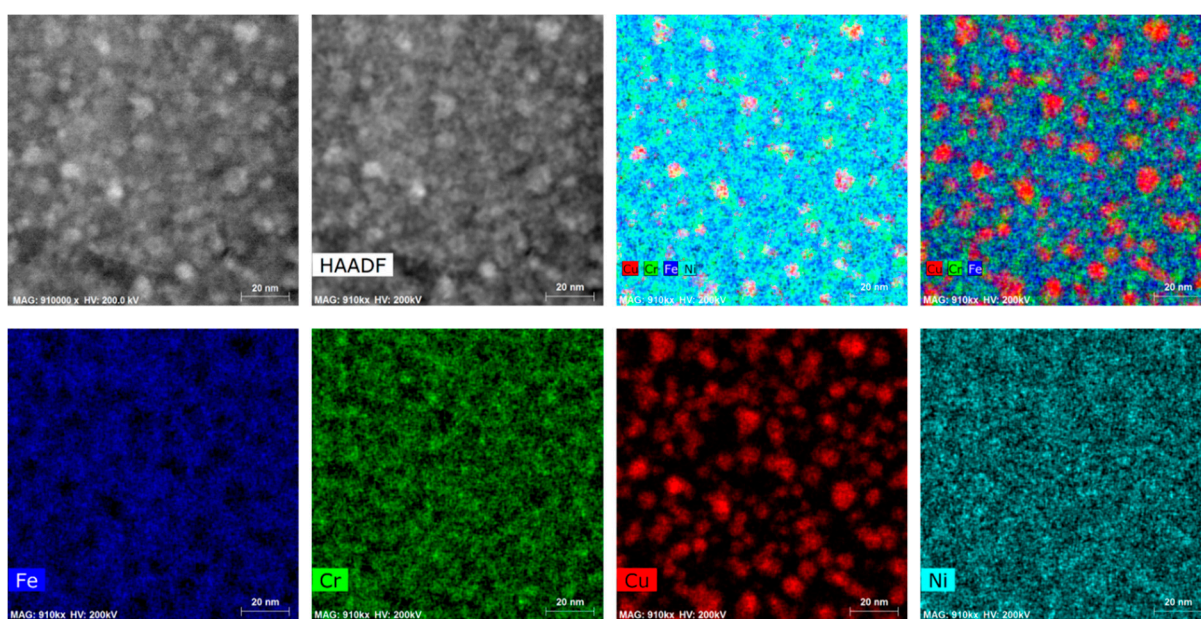

**Supplementary Figure S6.** TEM-EDS analysis of **NSA specimen** showing homogeneous nano-scale Cu-rich precipitation (magnification: 910 kx)
